# Supplementary material
Source: PubMed Central journal article supplement (PMC2868456)
Supplement: supp_51_2_1198__2.pdf [file supp_51_2_1198__2.pdf]

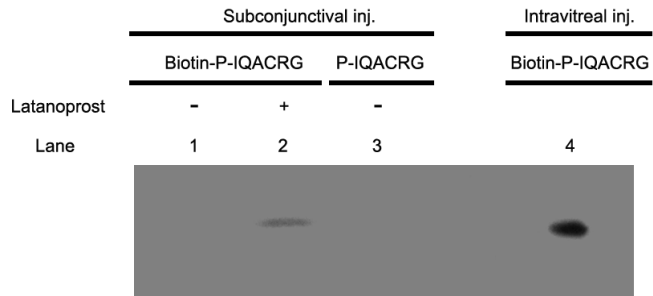

**Supplementary Figure S2.** Retinas were harvested after subconjunctival injection of 3 nmol of biotin-P-IQACRG following daily instillation of latanoprost (lane 2) or after intravitreal injection of 150 pmol of biotin-P-IQACRG (lane 4). Samples were subjected to avidin precipitation and blotting.
